# Supplementary material
Source: publisher figshare collection journal article supplement (https://acs.figshare.com/ndownloader/files/4125355)
Supplement: Supplementary file 1 [file 4125355]

## **Supplementary Information**

### **Modulation of Tau Protein Fibrillization by Oleocanthal**

Maria Chiara Monti, Luigi Margarucci, Raffaele Riccio, and Agostino Casapullo\*

Dipartimento di Scienze Farmaceutiche e Biomediche, Università degli Studi di Salerno, Via Ponte  
don Melillo, 84084 Fisciano, Italy

## Tau-441 Modified Peptides after Oleocanthal (1) Treatment.

| Tau441 Peptides*         | [M-H] <sup>+</sup> | ΔMw 92 Da | Modified Lysine              |
|--------------------------|--------------------|-----------|------------------------------|
| 6-23                     | 2054,1367          |           |                              |
| 6-24                     | 2182,2485          |           |                              |
| 6-24 ox                  | 2198,2678          |           |                              |
| 24-44                    | 2294,2883          |           |                              |
| 25-44                    | 2165,2239          |           |                              |
| 45-67                    | 2391,2114          |           |                              |
| 68-87                    | 1955,2219          |           |                              |
| 88-126                   | 3956,8425          |           |                              |
| 131-155                  | 2533,4072          |           |                              |
| 133-143                  | 1550,0264          |           |                              |
| 133-143                  | 1213,1298          | x         | K140 or K141                 |
| 133-150                  | 1778,6976          |           |                              |
| 141-163                  | 2249,2732          |           |                              |
| 144-170                  | 2620,959           |           |                              |
| 156-170                  | 1423,9475          |           |                              |
| 156-174                  | 1833,0383          |           |                              |
| 156-180                  | 2424,6321          |           |                              |
| 164-190                  | 2696,5581          |           |                              |
| 181-194                  | 1411,8999          |           |                              |
| 181-209                  | 2786,1504          |           |                              |
| 195-209                  | 1394,8037          |           |                              |
| 195-221                  | 2684,686           |           |                              |
| 210-211                  | 1309,9122          |           |                              |
| 210-224                  | 1664,1287          |           |                              |
| 210-225                  | 1792,25            |           |                              |
| 210-230                  | 2316,2471          |           |                              |
| 212-224                  | 1420,9701          |           |                              |
| 222-242                  | 2361,4546          |           |                              |
| 225-242                  | 1895,2795          |           |                              |
| 225-242                  | 1986,8715          | x         | K225 or K234 or K240         |
| 231-242                  | 1242,8788          |           |                              |
| 235-242                  | 911,02             | x         | K240                         |
| 241-257                  | 1986,8715          | x         | K254                         |
| 241-257ox                | 1910,2379          |           |                              |
| 243-259ox                | 1883,235           |           |                              |
| 258-280                  | 2525,5098          | x         | K259 or K267 or K274         |
| 260-280                  | 2217,2493          |           |                              |
| 260-280                  | 2310,1184          | x         | K267 or K274                 |
| 260-281                  | 2437,5579          | x         | K267 or K274 or K280         |
| 268-280                  | 1467,8977          | x         | K274                         |
| 281-298                  | 1977,2791          |           |                              |
| 299-317                  | 1979,1586          |           |                              |
| 312-343                  | 3406,2439          | x         | K317 or K321 or K331 or K340 |
| 318-343                  | 2675,8945          |           |                              |
| 322-340                  | 1917,2693          |           |                              |
| 341-349                  | 1137,7769          |           |                              |
| 344-347                  | 522,245            |           |                              |
| 354-369                  | 1580,0566          |           |                              |
| 354-370                  | 1707,0985          |           |                              |
| 371-383                  | 1586,9957          |           |                              |
| 384-395                  | 1331,9078          |           |                              |
| 384-406                  | 2413,2583          |           |                              |
| 386-406                  | 2215,3679          |           |                              |
| 407-438                  | 3244,38            |           |                              |
| * 100% Sequence coverage |                    |           |                              |

**Figure S1.** Proteolytic map of tau-441:1 complex at 37 °C.

**Reaction Profile of Oleocanthal (**1**) with Basic Amino Acids.** The reactivity of **1** towards the basic amino acids l-lysine and l-arginine has been carried out by HRESIMS, HPLC-ESIMS and MS<sup>n</sup> experiments. Each amino acid (final concentration 250 μM) was dissolved in sodium acetate 20 mM at a neutral pH and an appropriate volume of **1**, dissolved in CH<sub>3</sub>CN, was added (final concentration 25 μM). The amount of CH<sub>3</sub>CN was kept lower than 5%. The mixture was incubated at 37 °C for 40 min and analyzed by RP-HPLC-MS on a Phenomenex C<sub>18</sub> narrow-bore column by means a linear gradient from 10 % to 80% aqueous acetonitrile over 30 min. The mass spectrometer was a Q-TOF Premiere from Waters, Co.

In order to assess the nitrogen side chain as the sole nucleophilic center on the above-mentioned amino acids, the reactivity of l-alanine was tested towards **1**. LC-MS runs of the reaction mixture after 40 min did not show any adduct between l-alanine and **1**, confirming the lack of reactivity of the α-amino group.

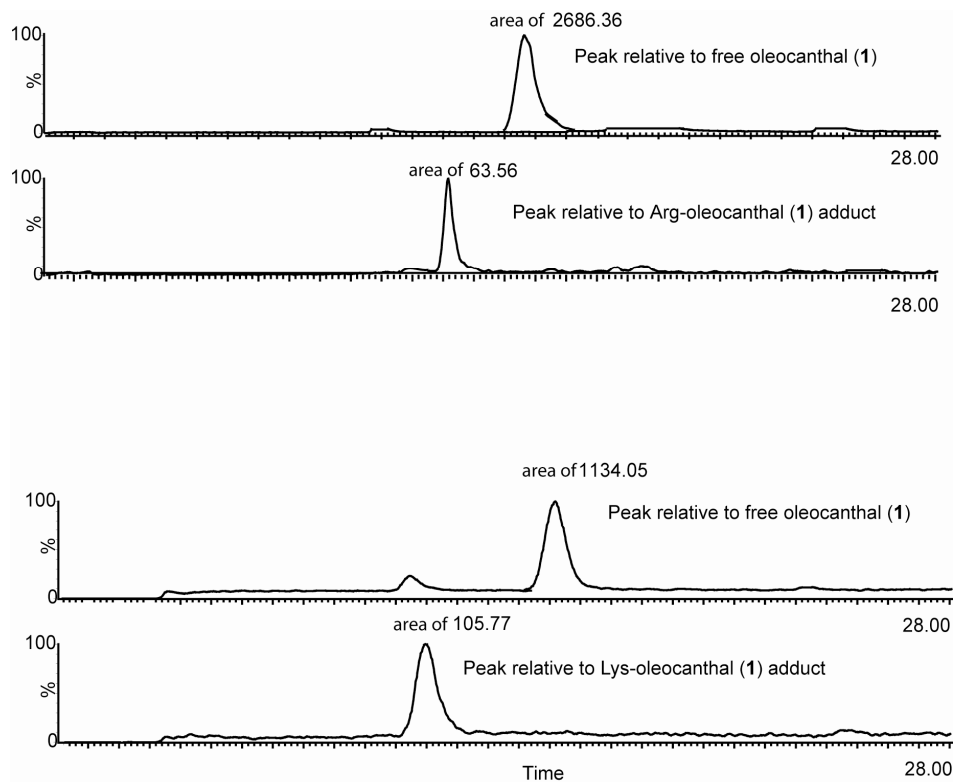

**Figure S2.** RP-HPLC-MS of reaction mixtures of **1** with l-Lys (below) and l-Arg.

**Reaction Profile of Oleocanthal (**1**) with l-Lysine.** The LC-MS analysis performed on a 1:l-Lys reaction mixture showed the formation of a single adduct at  $m/z$  433.3, corresponding to the imine of **1** generated by the nucleophilic attack of the l-Lys  $\epsilon$ -amino group on the oleocanthal carbonyl residue at C-3. The relative areas of the peaks at  $m/z$  433.3 and 327.3, corresponding to the sodiated oleocanthal species, revealed that only a small fraction of **1** reacted with l-Lys (Figure S2). The imine nature of the **1** adduct was confirmed by a displacement experiment with hydroxylamine ( $\text{NH}_2\text{OH}$ ). Addition of  $\text{NH}_2\text{OH}$  to the reaction mixture produced a **1**-oxime and free l-Lys, as detected by LC-MS.

**Reaction Profile of Oleocanthal (**1**) with l-Arginine.** The reaction of **1** with l-Arg followed a pathway similar to that of l-Lys, revealing the formation of a single adduct at  $m/z$  461.3. As in the above-discussed case, this species corresponded to the imine of **1** generated by the nucleophilic attack of the arginine guanidinium group onto the C-3 aldehyde carbonyl of **1**. The relative areas of the peaks at  $m/z$  461.3 and 327.3 (sodiated oleocanthal species) revealed a low reactivity of **1** with l-Arg (Figure S2). As in the case of l-Lys, the treatment of the reaction mixture with hydroxylamine produced a **1**-oxime and free l-Arg, confirming the imine nature of the adduct.

**Reaction Profile of Oleocanthal (**1**) with Myoglobin, Lysozyme and Human Synovial PLA<sub>2</sub>.** The covalent reactivity of **1** towards several proteins used as standards was tested by MALDI-MS on a MALDI-MICRO (Waters Co). Briefly, each protein at 3  $\mu\text{M}$  concentration in PBS 1X was incubated at 37 °C for 40 min in the presence of **1** (20 fold molar excess). Then, 1  $\mu\text{L}$  of the reaction mixture was loaded on a MALDI plate using  $\alpha$ -cyano-4-hydroxycinnamic acid dissolved in 1:1  $\text{CH}_3\text{CN}$ - $\text{H}_2\text{O}$ -0.1% TFA as matrix. As shown in Figure S3, no covalent adducts were measured for these proteins.

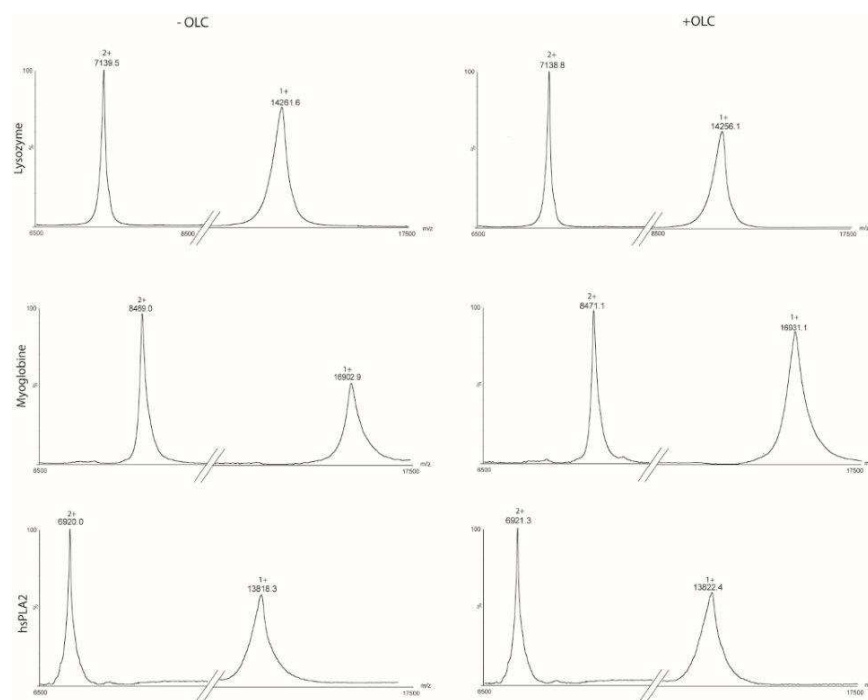

**Figure S3.** MALDI-MS analysis of myoglobin, lysozyme and human synovial PLA<sub>2</sub> incubated with oleocanthal (1).
